# Supplementary material for: Identification and Testing of Reference Genes for qRT-PCR Analysis During Pear Fruit Development
Source: Research Square preprint supplement (doi:10.21203/rs.3.rs-910473/v1), 2021-09-20
Supplement: Supplementary file 1 [file 3441bfa767ffd64be74fe6ca.xlsx]

## Sheet: Table1
Table 1. Primer sequences of 10 candidate reference genes.
gene ID	Primer Sequence (5'- 3')		Amplicon size (bp)	Tm (℃)
	Forward primer	Reverse primer
Pbr041114	ACTGGTGTGACAGCTTGCATTCTTG	GTATTGGCAAACCCCAGGCTATTC	196	65.2
Pbr018827	CCCCAAAAGAAGTTGATTACCTAACAGAT	AAGTTCAGTCACCCCAGCATCTCC	170	65.6
Pbr016048	GAGGTGTTTTTACAGTTTCGGGGATAC	CCTAGATCGATTCTGTCGCACAAAGT	162	65.3
Pbr028511	TCTCTCATTTTACCTTACCAACGCTAC	GAAAACACTCATTCTTCAACCTCGT	189	64.5
Pbr000214	TTTGGGTCTGAATCCGTGCTCTT	TCTCATTAACTCGCTCCGCTTCAC	208	64.9
Pbr038418	GATGGTGCTATGAAGATGCCAAATGT	TCCCGAGCATCACGATAGATTCAC	210	65.2
Pbr016129	GAGTACTGGTTGGGATGACCTTGC	TGACTCAGTAACAGCATCGCACCAAT	171	64.9
Pbr002841	ATGGGTATGCTCACTTGTCATCTGG	ACGATGAGACCATACAAGGCAAGAG	181	63.9
Pbr027964	CCCAATCATCTGCAAGCTAAATAAGG	GACTAACGACACCCGTAAGGCAAG	168	64.3
PbrTUB (Pbr042345)	TGGGCTTTGCTCCTCTTACTTCAC	CTTCCTTGGTGCTCATCTTACCACG	169	65.3
